# Supplementary material for: 3D single cell migration driven by temporal correlation between oscillating force dipoles
Source: eLife. 2022 Jul 28;11:e71032. doi: 10.7554/eLife.71032 (PMC9395190; doi:10.7554/eLife.71032)
Supplement: Figure 1—source data 1. — (i) Values for the height and the thickness of the cell derived matrix (CDM). (ii) Raw values of the CDM’s Young’s modulus. (iii) Values for the cytoplasts’ period of oscillation. [file elife-71032-fig1-data1.xlsx]

## Sheet: Figure 1 Supplementary 1c
Height mesh (um)	thickness cell (um)
15	7
10	7.5
17.5	7
12.5	8
11.04	7
9.5	6.44
10.92	8
14.28	7.14
11.76	9.66
12	10.08
12	8.82
16.5	6.72
16	7.98
10.66	6
	6
	6
	10
	8
	8
	10
	8.5
	8.5
	9
	6.5

## Sheet: Figure 1 Supplementary 1i
Young's modulus (Pa)
25.6
12.3
19.7
31.7
40.5
28.7
25.4
30
22.9
53.4
18
28.9
25.4
29.7
103
172
21.3
64.7
17
36.6
38.5
36.8
64.1
23.3
47.2
43.2
36.1
42.8
72.7
51.55
42
68.8
46.8
294
107
176
91

## Sheet: Figure 1 Supplementary 3c
Bin Center (min)	Frequency
15	0.115385
20	0.134615
25	0.153846
30	0.0769231
35	0.153846
40	0.0384615
45	0.0384615
50	0.115385
55	0.0769231
60	0
65	0.0769231
70	0
75	0
80	0
85	0
90	0.0192308
