# Supplementary material for: 3D single cell migration driven by temporal correlation between oscillating force dipoles
Source: eLife. 2022 Jul 28;11:e71032. doi: 10.7554/eLife.71032 (PMC9395190; doi:10.7554/eLife.71032)
Supplement: Figure 2—source data 1. — (i) Raw values for the periods of non-migrating and nocodazole-treated cells. (ii) Raw values for the periods of migrating cells. (iii) Front-back phase shift for migrating and non-migrating cells. (iv) Raw values for the amplitude of the divergence peaks. [file elife-71032-fig2-data1.xlsx]

## Sheet: Figure 2 panel g
Front period (min)	Back period (min)	Nocodazole Back and front period (min)
1.75	1.5	9
16.5	1	24
6.5	5.5	6
6.25	5	9
6	4.5	6
8	11	6
		6
		15
		9
		12
		9
		24

## Sheet: Figure 2 panel i
Back period (min)	Front period (min)
9.5	11.5
9	16
1.75	3.25
2.75	4.75
3.75	15.25
24	12
10	4
14.5	4.5
2.5	4.5
15	12.5
4.5	2
5	5.5
8	5.5

## Sheet: Figure 2 panel k
migrating cells time shift (min)		non-migrating cells time shift (min)
-0.1667		0
-10		0
1		0
0.25		0
0.25		0
-0.5		0.5
1.5
-6
-2
-2.5
0
-3
-1

## Sheet: Figur 2 Supplement 2
Migrating		Non-migrating
back	front	back	front
0.0229253	0.00261986	0.00173317	0.0014174
0.00111978	0.00183163	0.00673286	0.0179819
0.00204507	0.00206941	0.00357169	0.00305077
0.00229995	0.00165837	0.00602899	0.00794518
0.0190562	0.00969148	0.00209416	0.00147352
0.00691056	0.00544109	0.00672232	0.00579158
0.00309986	0.00208751
0.0037143	0.00073094
0.00199569	0.00692263
0.0499396	0.0642917
0.00125728	0.00172337
