# Supplementary material for: 3D single cell migration driven by temporal correlation between oscillating force dipoles
Source: eLife. 2022 Jul 28;11:e71032. doi: 10.7554/eLife.71032 (PMC9395190; doi:10.7554/eLife.71032)
Supplement: Figure 3—source data 1. — (i) Raw data for the dipole and quadrupole moments in panel Figure 3d. (ii) Raw data for the dipole and quadrupole moments in panel Figure 3e. (iii) Raw data for the angular distribution. [file elife-71032-fig3-data1.xlsx]

## Sheet: Figure 3 d
Dipole (D)	Quadrupole (Q)	Error D	Error Q
-0.0556061	-1.12791	0.00739959	0.217438
-0.0559856	-0.22128	0.00771085	0.0859457
-0.0454487	0.0709459	0.006743	0.130995
-0.0323367	-0.360464	0.005396	0.0572217
-0.0185068	-0.269634	0.00306369	0.0496742
0.00350709	-0.0222433	0.00691291	0.158088
0.00736824	0.52181	0.0121591	0.436051
-0.0304872	1.29991	0.00646879	0.626227
-0.0605632	0.863317	0.0056829	0.355689
-0.0811878	-0.0492154	0.0160574	0.228068
-0.0942786	-1.07976	0.0207172	0.48107
-0.10967	-2.20727	0.0276396	0.884016
-0.110775	-2.91145	0.0295576	1.22889
-0.0623282	-1.67625	0.0251428	1.26602
-0.0268338	1.31868	0.0162778	0.634256
-0.0384006	1.48646	0.0178556	0.58887
-0.0766469	-1.97008	0.0250833	1.3113
-0.102289	-4.32365	0.0267893	1.64945
-0.111793	-3.85517	0.0256772	1.35156
-0.112713	-2.19317	0.0236667	0.793525
-0.164533	-1.85496	0.0394963	0.910012
-0.21201	0.693253	0.0480489	0.484353
-0.223658	2.85843	0.0546678	0.325794
-0.208141	1.53352	0.0498647	0.652933
-0.14472	-4.11614	0.0436723	1.97615
-0.0213946	-10.6858	0.0114414	3.2362
0.0666819	-11.1804	0.0127055	3.1975
0.0742677	-6.57563	0.0186718	2.08299
-0.00268319	-0.670698	0.00667264	0.776336
-0.0180871	2.23021	0.0149567	0.139581

## Sheet: Figure 3 e
Dipole (D)	Quadrupole (Q)	Error D	Error Q
-0.015306	-1.92848	0.00450655	1.14362
-0.055319	-1.79699	0.0249988	1.16891
-0.0742478	-1.78111	0.0361125	1.03605
-0.0491408	-2.1794	0.0243095	1.09436
0.00549148	-3.04289	0.00687796	1.27215
0.0366423	-3.77028	0.017696	1.72816
0.0323144	-3.05999	0.0122776	1.51645
-0.00511375	-1.60901	0.0111451	0.993372
-0.0830965	-0.252296	0.0507009	0.413857
-0.185465	0.127717	0.100634	0.409782
-0.303718	1.36306	0.157018	0.434382
-0.361808	2.01569	0.174898	0.675837
-0.308435	1.64448	0.145848	0.582483
-0.183044	0.233199	0.0819498	0.31363
-0.0325518	-2.30693	0.0117119	1.2193
0.0765524	-4.23907	0.0470159	1.99407
0.207981	-8.20819	0.114601	3.75018
0.272619	-9.6197	0.143374	3.98105
0.263131	-8.95871	0.138152	3.60597
0.195144	-6.53473	0.0995813	2.69281

## Sheet: Figure 3 Supplement 2
Angle migrating N1		Angle migrating N3
-1.10885		1.16207
-0.062197		1.182
-0.577676		-1.52448
0.751015		-1.51954
-0.118436		1.51029
-0.018783		0.981077
0.243009		0.949536
-1.28552		0.735096
-0.840495		-1.47788
0.106813		-0.73714
-0.656633		-1.44767
1.19963		1.13946
-0.656349		-1.18802
-0.595317		-0.692515
-0.447084		-0.139764
-0.511125		1.074
0.334465		-1.0786
-0.032052		-1.45353
-0.221169		-0.734896
-0.159774		-1.01371
-0.367599		-0.963763
0.022429		-1.46927
0.341639		1.44445
0.163851		-1.11152
0.026032		-1.34807
-0.488888		1.45093
-1.34379		0.945425
-0.275127		-0.777744
-0.78999		1.13075
0.036		-0.987463
0.365368		-1.25114
-0.332133		1.39475
0.96546		-0.97315
-0.158388		-1.13699
0.415445		-0.961983
0.703815		-1.54255
0.149053		0.327781
0.168642		0.567245
0.60415		-1.06988
0.263495		-0.465852
0.302625		1.32678
0.296837		0.735304
-0.739459		-0.165136
-0.197238		-1.25494
-0.362987		-0.631346
0.23973		-0.227195
0.142956		1.38304
0.075873		1.40398
0.163856		0.714792
-0.13902		0.217763
0.244661		-1.44567
0.680131		-1.34453
0.397348		0.854229
1.54672		1.40689
0.362671		-0.061102
0.219497		-1.51377
-0.308023		-1.48606
0.09762		-1.21109
0.139462		1.47355
-0.008528		-1.2461
0.37078		0.991091
-0.087026		-1.21383
-1.50645		-0.759425
-0.557786		1.32245
0.645291		1.32886
-0.128863		1.37731
1.33409		-0.966826
0.350076		1.3604
0.715841		1.47861
-0.102297		1.25933
-0.000736		-0.407325
0.28017		-1.13182
0.469035		0.850493
0.077009		0.096659
-0.034663		-0.055568
-0.78221		1.48945
-0.701627		-0.433982
0.672627		-1.3063
-0.081881		-0.705791
-0.488294		-0.995599
-0.058091		-1.5695
0.027261		-1.55082
-0.18725		-0.141174
1.04525		-1.01209
0.145029		-1.53368
-0.369533		-1.32208
-0.077094		1.04142
0.109608		-1.23904
0.036019		-0.412109
-0.126787		-0.188196
-0.271725		-0.047969
-0.100358		0.069081
-0.419804		0.866906
-0.348688		0.879003
0.265006		-1.44497
-0.042623		-1.16173
0.413124		0.471369
-0.204912		0.515675
0.150747		-0.710763
-0.321902		0.909166
-0.021269		-0.270757
-0.138616		-0.616905
-0.46625		0.313955
-0.138891		-0.91718
-0.046882		0.355698
-0.040924		-1.08405
-0.038896		-0.962179
0.635036		-0.912044
-0.092905		-0.789668
0.13854		0.050484
-0.172453		-0.303899
-0.164232		-0.415028
0.830571		-0.472168
-0.500677		-0.106479
-0.02913		1.4173
0.363912		-1.51853
-0.866615		-1.00131
0.611455		-0.410001
0.152984		-0.157589
-0.174813		-0.393656
-0.080039		0.968013
0.230756		-1.19899
-0.015042		1.29367
-0.05706		1.12824
-0.883754		1.48977
-0.159406		-0.366509
0.549014		-0.428733
-0.501581		-0.409107
-0.464661		-0.373648
-0.541423		-0.277131
0.062481		0.050889
-0.337285		0.24007
-0.08359		-0.427402
-0.060395		1.2957
-0.058035		-0.287559
0.295923		-0.336865
-0.162523		-0.472805
-0.551322		-0.374372
-0.478934		-0.506902
-0.102058		-0.485203
0.533224		0.979843
-0.027019		-1.36081
-0.024609		-1.36898
1.13298		1.46321
-0.333886		-0.255961
0.317018		0.086865
0.840933		-0.123229
-0.081226		1.40995
-0.187351		1.48588
-0.438604		-1.41465
0.541708		1.38056
-0.289414		-0.659384
0.144948		-0.217098
-1.29607		0.154005
0.208024		-0.767119
0.249608		1.23386
0.468598		1.53392
-0.406097		1.29208
-0.067789		-0.314217
-0.207191		-0.413607
0.39169		1.21795
0.433202		1.12423
-0.044735		-0.252923
0.007557		0.195231
0.240399		-0.081702
-0.144264		1.53214
0.335278		-0.133608
0.530133		-0.240978
0.166192		1.36042
-0.137695		-0.227786
-0.078215		-0.063977
0.228331		0.700754
-0.246858		-0.87119
0.072477		-0.52378
0.773487		-0.709599
-0.351949		1.01569
0.237195		0.260611
0.434346		-0.023744
0.02853		-0.415676
0.383909		0.600271
0.384472		0.52808
0.658867		-0.631422
-0.682549		-0.724538
0.242789		0.616897
0.070853		-1.13067
0.126947		0.336274
-0.344429		1.56419
0.40352		0.251148
-0.742027		-0.264872
-0.305782		1.25073
0.278946		0.990507
0.042964		0.790116
0.045176		0.393189
0.25941		1.49765
-0.439578		1.24613
0.183852		1.19981
0.36676		-0.389379
-0.082504		1.30881
0.577801		-0.122785
0.228248		-0.546374
-0.163889		-0.567759
0.113993		0.947039
-0.645083		0.817957
-0.854215		0.370879
-0.193221		0.725907
-0.664901		-1.22194
-0.172086		1.40007
-0.222607		-0.194002
-0.264423		-1.32593
0.552037		1.50269
-1.14266		-1.4616
-0.363966		1.25152
0.143689		-1.55955
-0.4184		0.454155
-0.292211		-1.00685
-0.54654		0.268278
0.590395		0.384181
0.466752		1.13792
-1.18729		1.20207
-0.767745		1.36306
-0.201186		0.413444
0.164867		0.984892
0.605238		1.04596
-0.768652		1.01733
-0.495745		-0.191148
0.344401		0.621288
-0.243527		-1.44155
0.484972		1.37151
-0.506232		0.136565
-0.599387		-1.4868
-0.438723		0.76779
-0.785375		1.23048
0.04192		1.22808
-0.430456		0.412945
-0.632318		-0.31305
0.634974		1.2486
