# Supplementary material for: 3D single cell migration driven by temporal correlation between oscillating force dipoles
Source: eLife. 2022 Jul 28;11:e71032. doi: 10.7554/eLife.71032 (PMC9395190; doi:10.7554/eLife.71032)
Supplement: Figure 4—source data 1. — (i) Data shown in the panel Figure 4d, persistent speed vs. period. (ii) Persistent speed for WT cells, C8-BPA-treated cells, CK666-treated cells, ML-7-treated cells and Y27632-treated cells. (iii) Period of WT cells, C8-BPA-treated cells, CK666-treated cells, ML-7-treated cells, and Y27632-treated cells. (iv) Dipole and quadrupole moments of simulated cells (migrating and non-migrating). [file elife-71032-fig4-data1.xlsx]

## Sheet: Figure 4d
Persistent speed (µm/min)	WT period (min)	t error	x error	c8 period (min)	t error	x error	ck666 period (min)	t error	x error	ml7 period (min)	t error	x error	y27 period (min)	t error	x error
8	1,781	0,5	0,32
11	1,216	0,5	0,32
12	0,8	0,5	0,32
19	1,05	0,5	0,32
7	0,92	0,5	0,32
9	1,11	0,5	0,32
17	0,39	0,5	0,32
10	1,12	0,5	0,32
21	0,53	0,5	0,32
30	1,3	0,5	0,32
8	1,66	0,05	0,6
12	0,42	1,5	0,16
18	0,18	1,5	0,16
15	0,39	1,5	0,16
12,3	0,73	0,88	0,27
25	0,71	2,5	0,06
20	0,18	2,5	0,06
35	0,22	2,5	0,06
20	0,28	2,5	0,06
16	0,55	2,5	0,06
--	--	--	--
22,5	0,72	1,25	0,13
32,5	0,71	1,25	0,13
22,5	0,92	1,25	0,13
15	0,99	1,25	0,13
--	--
39	--			0,10462	1,5	0,1
45	--			0,21533	1,5	0,1
33	--			0,25982	1,5	0,1
21	--			0,25471	1,5	0,1
24	--			0,213	1,5	0,1
21	--			0,26649	1,5	0,1
21	--			0,446	1,5	0,1
39	--						0,32414	1,5	0,1
36	--						0,45864	1,5	0,1
27	--						0,3917	1,5	0,1
27	--						0,24674	1,5	0,1
15	--						0,24377	1,5	0,1
18	--						0,22114	1,5	0,1
18	--							--	--	0,40566	1,5	0,1
21	--									0,54133	1,5	0,1
15	--									0,36695	1,5	0,1
39	--									0,50976	1,5	0,1
30	--									0,22051	1,5	0,1
18	--									0,47392	1,5	0,1
18	--									0,27515	1,5	0,1
24	--												0,48424	1,5	0,1
24	--												0,34644	1,5	0,1
42	--												0,24944	1,5	0,1
24	--												0,47639	1,5	0,1
27	--												0,53861	1,5	0,1
28,5	--												0,38549	1,5	0,1
30	--												0,35247	1,5	0,1
20,5	--												0,44958	1,5	0,1
18	--												0,49011	1,5	0,1

## Sheet: Figure 4 Supplementary 1i
WT persistent speed (µm/min)	c8 persistent speed (µm/min)	ck666 persistent speed (µm/min)	ML-7 persistent speed (µm/min)	Y-27632 persistent speed (µm/min)
1.781	0.10462	0.32414	0.40566	0.48424
1.216	0.21533	0.45864	0.54133	0.34644
0.8	0.25982	0.3917	0.36695	0.24944
1.05	0.25471	0.24674	0.50976	0.47639
0.92	0.213	0.24377	0.22051	0.53861
1.11	0.26649	0.22114	0.47392	0.38549
0.39	0.446		0.27515	0.35247
1.12				0.44958
0.53				0.49011
1.3
1.66
0.42
0.18
0.39
0.73
0.71
0.18
0.22
0.28
0.55
0.72
0.71
0.92
0.99

## Sheet: Figure 4 Supplementary 1j
WT period (min)	c8 period (min)	ck666 period (min)	ML-7 period (min)	Y-27632 period (min)
8	39	39	18	24
11	45	36	21	24
12	33	27	15	42
19	21	27	39	24
7	24	15	30	27
9	21	18	18	28.5
17	21		18	30
10				20.5
21				18
30
8
12
18
15
12.3
25
20
35
20
16
22.5
32.5
22.5
15

## Sheet: Figure 4 Supplement 2
migrating no noise					migrating noise					non-migrating no noise					non-migrating noise
Dipole (D)	Quadrupole (Q)	Error D	Error Q		Dipole (D)	Quadrupole (Q)	Error D	Error Q		Dipole (D)	Quadrupole (Q)	Error D	Error Q		Dipole (D)	Quadrupole (Q)	Error D	Error Q
-0.403708	2.4296	0.00401672	2.1519		-0.380648	2.10005	0.0242095	1.87911		0.293036	0	0.00280991	0		-0.478574	0.6058	0.00477777	0.0709846
-0.43033	4.41386	0.00423221	2.27885		-0.408677	4.22393	0.0259987	2.04256		0.378229	0	0.00362219	0		-0.403185	0.303625	0.00402103	0.0668725
-0.451908	6.21922	0.00443166	2.38706		-0.283094	2.89476	0.0180065	1.42641		0.468662	0	0.00449525	0		-0.31955	-0.139127	0.00318957	0.0551538
-0.473826	7.93422	0.00462965	2.51846		-0.405955	6.37782	0.0258281	2.0798		0.561222	0	0.00538299	0		-0.270236	0.178695	0.00269894	0.0464383
-0.490732	9.41633	0.00477157	2.62849		-0.396648	7.2866	0.0252363	2.04963		0.657775	0	0.0063171	0		-0.176455	0.223786	0.0017614	0.0338562
-0.50579	10.6456	0.00490283	2.64638		-0.495706	10.1241	0.0315345	2.58077		0.752065	0	0.00719793	0		-0.132482	-0.105339	0.00132175	0.0267473
-0.516104	11.6439	0.00499742	2.70039		-0.498472	10.7436	0.0317096	2.61107		0.843467	0	0.00810691	0		-0.0768784	0.122851	0.00076727	0.0146102
-0.522686	12.3993	0.00503333	2.76147		-0.481998	10.9823	0.0306598	2.55708		0.929047	0	0.00891978	0		-0.0369399	0.0162878	0.00036882	0.0067524
-0.526949	12.9222	0.00510034	2.80532		-0.557609	13.4332	0.035462	2.9949		1.00627	0	0.00966155	0		-0.0052109	-0.0182569	5.15e-05	0.00097718
-0.525506	13.1214	0.00510496	2.80483		-0.475658	11.8863	0.0302429	2.58161		1.0748	0	0.0103211	0		0.0196882	-0.0002889	0.00019616	0.00348498
-0.521104	13.0887	0.00508343	2.80453		-0.436624	10.9323	0.0277634	2.38916		1.13048	0	0.0108794	0		0.041408	-0.0636847	0.00041308	0.00669786
-0.515157	12.8641	0.00500729	2.81574		-0.538741	12.3077	0.034258	2.95857		1.16894	0	0.0112561	0		0.0480847	0.0480512	0.00047893	0.00804979
-0.503589	12.3965	0.00490657	2.79397		-0.486308	11.903	0.030919	2.69637		1.19311	0	0.0114839	0		0.0421295	0.0178251	0.00041991	0.00653415
-0.488936	11.7086	0.00476811	2.7367		-0.455622	10.5585	0.0289664	2.5308		1.20285	0	0.0115813	0		0.0363202	-0.0382578	0.00036262	0.00553896
-0.471733	10.8654	0.00461701	2.65341		-0.478988	10.439	0.030446	2.67119		1.19093	0	0.0114475	0		0.0170163	-0.187215	0.00017036	0.00249573
-0.44954	9.87964	0.00440515	2.55649		-0.369799	8.76468	0.0235036	2.08116		1.16179	0	0.0111721	0		0.0161197	0.0173388	0.000161	0.00295587
-0.42601	8.79157	0.00419521	2.45095		-0.383518	6.75197	0.024372	2.14182		1.11358	0	0.0107135	0		0.0071105	0.0466862	7.15e-05	0.00142244
-0.398621	7.54029	0.00394603	2.30037		-0.366338	6.68833	0.023221	2.05244		1.04696	0	0.010062	0		-0.0147663	-0.0985672	0.00014768	0.0032337
-0.369223	6.3798	0.00367005	2.14236		-0.354124	5.76076	0.0224422	1.98405		0.962326	0	0.00926291	0		-0.0355822	-0.0720483	0.00035502	0.00627944
-0.336899	5.23305	0.00336481	1.98125		-0.309714	4.28604	0.0196261	1.73986		0.862854	0	0.00828613	0		-0.0380905	-0.0422364	0.00038038	0.00625611
-0.302638	4.15105	0.00303203	1.80663		-0.288973	4.23801	0.0183073	1.63484		0.74348	0	0.00714386	0		-0.0435297	-0.125797	0.00043432	0.00762568
-0.265914	3.11551	0.00267091	1.60396		-0.236977	2.54683	0.0150162	1.34162		0.615559	0	0.00592131	0		-0.0447086	0.0359737	0.00044628	0.00739217
-0.227921	2.19879	0.00229876	1.38367		-0.222938	2.07223	0.0141256	1.26553		0.474507	0	0.0045684	0		-0.0352993	-0.0859124	0.00035215	0.00653584
-0.187984	1.40843	0.00191211	1.15788		-0.179722	0.937446	0.0113904	1.02679		0.325825	0	0.00312842	0		-0.0281071	0.0007228	0.0002796	0.00479752
-0.146823	0.770726	0.0015053	0.909786		-0.139067	0.711306	0.00881171	0.796304		0.169877	0	0.00163099	0		6.28e-05	0.022976	1.93e-06	0.00066764
-0.104442	0.288496	0.00108177	0.642142		-0.0820338	0.194116	0.00519674	0.468982		0.0114588	0	0.00011022	0		0.034179	-0.0365083	0.00034064	0.00563948
-0.0617808	-0.0094718	0.00064809	0.383653		-0.0550216	0.103773	0.00348509	0.316155		-0.148087	0	0.00142571	0		0.0745199	0.0457062	0.00074323	0.0128878
-0.0185236	-0.135879	0.0001987	0.11672		-0.0149836	-0.135004	0.00094897	0.0872244		-0.30126	0	0.00290649	0		0.114128	-0.0416569	0.00113753	0.0190372
0.0248507	-0.0899728	0.00025846	0.154498		0.0249301	-0.103384	0.00157956	0.144947		-0.4504	0	0.00435285	0		0.162724	-0.371883	0.00162199	0.0246284
0.0679717	0.120732	0.00071652	0.427075		0.0582457	0.182049	0.00369033	0.342743		-0.593519	0	0.00573387	0		0.246534	-0.166764	0.00245741	0.0374064
0.110684	0.477434	0.00117699	0.702557		0.095908	0.682118	0.00607733	0.570832		-0.723123	0	0.00698457	0		0.312667	0.0954283	0.00311845	0.0491234
0.152854	0.9566	0.00162715	0.975215		0.147657	0.817756	0.00935478	0.883372		-0.847405	0	0.00820472	0		0.383382	-0.145378	0.00382601	0.0614718
0.193492	1.54119	0.0020745	1.24337		0.163052	1.41532	0.0103308	0.98651		-0.943824	0	0.00913916	0		0.449046	-0.504657	0.00448428	0.0714309
0.233204	2.19088	0.00250743	1.52384		0.206185	2.2614	0.0130645	1.2599		-1.03459	0	0.0100001	0		0.57754	0.0984745	0.0057713	0.0999174
0.27128	2.88469	0.00291699	1.79196		0.244144	2.92091	0.0154686	1.50497		-1.1056	0	0.0106717	0		0.617189	0.150151	0.00617003	0.107163
0.307876	3.58599	0.00332856	2.05113		0.308156	3.52184	0.0195239	1.9075		-1.15378	0	0.011118	0		0.699929	-0.511174	0.00699274	0.113218
0.342011	4.26675	0.00370925	2.29781		0.343379	4.2968	0.0217576	2.14352		-1.189	0	0.0114639	0		0.740407	0.102139	0.00739908	0.12353
0.37325	4.87826	0.00405539	2.53472		0.334619	4.71493	0.0212024	2.10573		-1.20048	0	0.011593	0		0.759703	0.977579	0.00758363	0.123427
0.402328	5.40393	0.0043868	2.74725		0.352437	4.75624	0.0223319	2.2314		-1.19628	0	0.0115093	0		0.94912	0.611521	0.00948668	0.169415
0.428942	5.8186	0.00467815	2.94461		0.387524	5.56846	0.0245579	2.4727		-1.17552	0	0.0112824	0		0.933636	-0.230103	0.00933278	0.161901
0.451771	6.07634	0.0049254	3.11464		0.357077	5.40924	0.0226296	2.2956		-1.13626	0	0.0108877	0		1.09276	-1.01824	0.010924	0.185555
0.472721	6.16267	0.00513321	3.27788		0.411548	5.58725	0.0260793	2.64294		-1.0827	0	0.0103534	0		0.959911	-0.99672	0.00959639	0.162623
0.489788	6.05732	0.0053042	3.41802		0.41539	5.51413	0.0263264	2.68467		-1.01672	0	0.00968397	0		1.05378	0.364456	0.0105358	0.186332
0.503574	5.76397	0.00542424	3.50883		0.420916	5.13956	0.0266748	2.72317		-0.941923	0	0.00895281	0		0.968645	-0.421538	0.00968581	0.166939
0.515297	5.27259	0.00555793	3.58466		0.52617	5.72104	0.0333434	3.39733		-0.857011	0	0.0081516	0		1.04399	0.712016	0.0104208	0.169748
0.520995	4.52973	0.00560514	3.64347		0.444552	4.46376	0.0281734	2.88793		-0.76657	0	0.00727197	0		0.960606	-0.889209	0.00959434	0.153435
0.525107	3.5972	0.00565648	3.68386		0.504998	4.09444	0.0320033	3.28004		-0.672754	0	0.00638469	0		0.745599	-1.31187	0.00745183	0.117866
0.524509	2.45903	0.0056294	3.68838		0.479821	2.86153	0.0304059	3.12457		-0.576841	0	0.00546749	0		0.742242	-0.75673	0.00742327	0.125713
0.521437	1.13676	0.00555137	3.68124		0.53114	1.62593	0.0336501	3.47417		-0.482422	0	0.00455693	0		0.741689	-0.167609	0.00742116	0.128807
0.512952	-0.348374	0.00540893	3.6409		0.444135	-0.132677	0.0281357	2.91618		-0.392128	0	0.00369649	0		0.652174	-0.175993	0.00652158	0.109039
0.504438	-1.90939	0.00528461	3.57695		0.609733	1.04211	0.038635	4.03095		-0.306183	0	0.00289659	0		0.536299	0.135965	0.00536397	0.0897683
0.488115	-3.65127	0.00505814	3.46808		0.451026	-3.64142	0.0285611	2.99464		-0.227586	0	0.00214703	0		0.420962	-0.0682743	0.00420568	0.0645915
0.470095	-5.3998	0.00481507	3.35376		0.409442	-4.08387	0.0259271	2.73694		-0.157162	0	0.00148455	0		0.187304	-1.34376	0.00187173	0.0245881
0.450437	-7.19102	0.00457164	3.22864		0.480341	-5.64105	0.0304156	3.23349		-0.0965968	0	0.00091432	0		0.204927	1.33043	0.0020465	0.0444173
0.427031	-8.96505	0.00426541	3.07471		0.497481	-7.5138	0.0314954	3.37565		-0.0461801	0	0.00043659	0		-0.0252383	-0.416044	0.00025199	0.00747399
0.398698	-10.6861	0.00389718	2.87853		0.363079	-10.2017	0.0229743	2.52395		-0.0062471	0	5.92e-05	0		-0.160824	0.578758	0.00160808	0.026037
0.368925	-12.2743	0.00355616	2.64318		0.321672	-11.8589	0.0203502	2.29616		0.0230543	0	0.00021859	0		-0.369595	-0.571086	0.00369427	0.0768322
0.337029	-13.6976	0.00317101	2.40265		0.30537	-11.0371	0.0193218	2.18309		0.0423021	0	0.00040041	0		-0.357247	-3.06473	0.0035685	0.0901173
0.302166	-14.98	0.00276387	2.14955		0.237444	-12.2994	0.015018	1.79038		0.0518388	0	0.0004928	0		-0.388027	1.2023	0.00387772	0.0723432
0.265219	-16.0455	0.00233636	1.85708		0.165119	-14.0978	0.0104354	1.4273		0.0528284	0	0.00050218	0		-0.7126	0.999018	0.00712491	0.125728
0.228929	-16.8724	0.00192754	1.59252		0.271747	-14.5767	0.0171928	2.08119		0.0469443	0	0.00044521	0		-0.731574	0.738693	0.00730445	0.126007
0.188788	-17.4238	0.00148161	1.284		0.208506	-14.9043	0.0131929	1.71006		0.0348109	0	0.00033132	0		-0.831697	-0.328307	0.00830066	0.150595
0.149102	-17.6945	0.00106453	0.984489		0.271146	-14.8624	0.017169	2.0938		0.0193167	0	0.00018362	0		-1.08921	-2.23612	0.0108704	0.199847
0.105896	-17.6977	0.00064798	0.656184		0.148986	-16.6499	0.0094352	1.45868		0.00162211	0	1.56e-05	0		-0.938173	-1.28395	0.00935943	0.162363
0.062618	-17.3869	0.00037143	0.345419		0.0735776	-16.5391	0.0046774	1.15523		-0.0161103	0	0.0001529	0		-0.969443	-1.42404	0.00967069	0.158717
0.0186969	-16.7662	0.0005145	0.0976399		-0.0172665	-15.5245	0.00123304	1.00162		-0.0323234	0	0.0003091	0		-1.06562	0.938659	0.0106417	0.170387
-0.0257846	-15.8444	0.00089324	0.342938		-0.139114	-13.3107	0.00884031	1.33289		-0.0452982	0	0.00043418	0		-0.985894	0.796642	0.00985705	0.167868
-0.0649881	-14.7202	0.00125745	0.632082		0.113177	-15.984	0.00718924	1.2766		-0.0520691	0	0.00049932	0		-1.01095	-0.190212	0.010107	0.177731
-0.110904	-13.2327	0.00168801	0.979237		-0.156002	-10.9049	0.00989754	1.3458		-0.0525451	0	0.00050424	0		-0.870611	0.28403	0.00870588	0.150793
-0.151943	-11.633	0.00207143	1.28758		-0.123372	-13.2651	0.00783439	1.25551		-0.0442934	0	0.00042274	0		-0.985355	0.0026595	0.00984697	0.166361
-0.193121	-9.7557	0.00245393	1.59943		-0.173988	-9.31099	0.0110331	1.42033		-0.0269106	0	0.0002568	0		-0.866955	-1.4641	0.00866501	0.154414
-0.232891	-7.76416	0.002818	1.90634		-0.216369	-8.50655	0.0137155	1.69064		0.00065344	0	6.84e-06	0		-0.790203	1.06371	0.00789281	0.118363
-0.270749	-5.63205	0.00316329	2.20162		-0.233176	-5.65309	0.0147771	1.76157		0.038719	0	0.00037118	0		-0.721203	-0.526568	0.00719778	0.117208
-0.306647	-3.455	0.00347932	2.47579		-0.239047	-4.34819	0.015147	1.79394		0.0873696	0	0.00083707	0		-0.764136	-0.696504	0.00763062	0.134261
-0.341372	-1.24642	0.00377526	2.74108		-0.3098	-2.5457	0.0196315	2.30698		0.146602	0	0.00140904	0		-0.613251	-0.23801	0.00611666	0.106763
-0.37486	1.00477	0.00405887	3.02057		-0.458427	2.49611	0.029052	3.40346		0.2152	0	0.00206689	0		-0.539569	0.333494	0.00538128	0.0919836
-0.402407	3.11902	0.00427425	3.24694		-0.35667	2.47705	0.0225999	2.665		0.292519	0	0.00280581	0		-0.486773	0.894631	0.00485626	0.078963
