# Supplementary material for: 3D single cell migration driven by temporal correlation between oscillating force dipoles
Source: eLife. 2022 Jul 28;11:e71032. doi: 10.7554/eLife.71032 (PMC9395190; doi:10.7554/eLife.71032)
Supplement: Figure 5—source data 1. — (i) Migration trajectories of cells which are exposed to laser ablation-induced contractions. [file elife-71032-fig5-data1.xlsx]

## Sheet: Figure 5 Supplementary 1b
single cut displacement (µm)		sequential cuts displacement (µm)
10.5		12.9
14.4		6.5
16.2		20.2
7.1		9.3
4.4		13.1
2.6
3.35
1.5
12.5
14.9
5.1
17.6
7.1
8.9
2.9

## Sheet: Figure 5 Supplementary 1c
left	time (min)	cell 1 position (µm)	cell 2 position (µm)	right	time (min)	cell 3 position (µm)	cell 4 position (µm)	cell 5 position (µm)
	0.02167	0.15	0.56569		0.02167	0	0.39598	0.66
	0.04333	0.15	0.63246		0.04333	0	0.28	0.88
	0.065	0.3	0.44721		0.065	0	0.28	0.88
	0.08667	0.6	0.44721		0.08667	0	0.28	0.88
	0.10833	0.6	0.44721		0.10833	0.19	0.28	0.88
	0.13	0.6	0.44721		0.13	0.19	0.6261	1.98
	0.15167	0.6	0.44721		0.15167	0.19	0.6261	1.98
	0.17333	0.75	1.41421		0.17333	0.19	0.6261	1.76
	0.195	0.6	1.41421		0.195	0.19	0.6261	1.76
	0.21667	0.6	1.26491		0.21667	0.19	0.6261	1.76
	0.23833	0.15	1.07703		0.23833	0.19	0.39598	1.76
	0.26	0.15	1.07703		0.26	0.19	0.39598	1.3914
	0.28167	0.33541	1.07703		0.28167	0.19	0.39598	1.60162
	0.30333	0.33541	1.07703		0.30333	0	0.39598	1.60162
	0.38667	0.33541	1.07703		0.38667	0	0.39598	3.11127
	0.47	0.33541	1.07703		0.47	0	0.39598	3.11127
	0.55333	0.33541	1.07703		0.55333	0	0.39598	3.11127
	0.63667	0.33541	0.89443		0.63667	0.57	0.39598	3.96
	0.72	0.33541	0.44721		0.72	1.14	0.39598	3.98437
	0.80333	0.42426	0.44721		0.80333	1.71	0.6261	4.44922
	0.88667	0.42426	0.2		0.88667	2.12426	0.88544	4.44922
	0.97	0.61847	0.2		0.97	2.40333	1.00955	4.91935
	1.05333	0.61847	0.2		1.05333	3.18498	1.00955	5.35283
	1.13667	0.61847	0.2		1.13667	3.24672	1.18794	6.22254
	1.22	0.61847	0.28284		1.22	3.24672	1.18794	6.90814
	1.30333	0.61847	0.28284		1.30333	3.56978	1.4	6.90814
	1.38667	0.6	1.0198		1.38667	3.82368	1.4	6.90814
	1.47	0.80777	1.41421		1.47	3.82368	1.4	7.16268
	1.55333	0.87464	1.61245		1.55333	3.91234	1.4	7.16268
	1.63667	0.87464	1.61245		1.63667	4.07947	1.4	7.20647
	1.72	0.84853	1.8		1.72	4.17135	1.4	7.20647
	1.80333	1.08167	1.8		1.80333	4.37413	1.4	7.85249
	1.88667	1.08167	2.2		1.88667	4.37413	1.79287	7.85249
	1.97	1.00623	2.2		1.97	4.21868	1.79287	7.73762
	2.05333	1.00623	2.2		2.05333	4.21868	1.79287	7.73762
	2.13667	0.94868	2.2		2.13667	3.8	1.79287	7.73762
	2.22	0.94868	2.2		2.22	3.8	1.79287	7.16606
	2.30333	1.06066	2.2		2.30333	3.50343	1.79287	7.16606
	2.38667	1.06066	2.60768		2.38667	3.50343	1.79287	7.16606
	2.47	1.2	2.60768		2.47	3.38285	1.79287	7.16606
	2.55333	1.2	3.00666		2.55333	3.38285	1.79287	7.16606
	2.63667	1.2	3.00666		2.63667	3.23558	1.79287	7.16606
	2.72	1.2	3.20624		2.72	3.09298	1.79287	7.16606
	2.80333	1.2	3.20624		2.80333	2.96789	1.63267	6.95701
	2.88667	1.2	3.20624		2.88667	2.68701	1.63267	6.95701
	2.97	1.2	3.20624		2.97	2.68701	1.63267	6.33432
	3.05333	1.2	3.20624		3.05333	2.68701	1.63267	6.33432
	3.13667	1.2	3.20624		3.13667	2.68701	1.63267	6.12849
	3.22	1.2	3.20624		3.22	2.41831	1.63267	6.12849
	3.30333	1.2	3.20624		3.30333	2.1496	2.01911	6.12849
	3.38667	1.2	3.40588		3.38667	2.01973	2.01911	6.54107
	3.47	1.2816	3.40588		3.47	2.01973	2.01911	6.54107
	3.55333	1.2816	3.40588		3.55333	2.01973	2.01911	6.82355
	3.63667	1.2816	3.80526		3.63667	1.9	2.01911	6.82355
	3.72	1.56605	3.80526		3.72	1.79246	2.01911	6.82355
	3.80333	1.71026	4.005		3.80333	1.69941	2.01911	7.02968
	3.88667	1.71026	4.005		3.88667	1.69941	2.01911	7.02968
	3.97	1.7557	4.005		3.97	1.56678	2.01911	7.10842
	4.05333	1.95	4.005		4.05333	1.56678	2.01911	7.31314
	4.13667	1.95	4		4.13667	1.56678	2.01911	7.31314
	4.22	1.95	4.005		4.22	1.56678	1.8783	7.44433
	4.30333	1.95	4.04475		4.30333	1.56678	1.8783	7.65271
	4.38667	1.95	4.12311		4.38667	1.56678	1.8783	7.65271
	4.47	1.95	4.12311		4.47	1.56678	1.8783	8.21399
	4.55333	2.08926	4.12311		4.55333	1.56678	1.8783	8.21399
	4.63667	2.08926	4.12311		4.63667	1.56678	1.8783	8.21399
	4.72	2.14767	4.12311		4.72	1.56678	1.8783	8.42057
	4.80333	2.14767	4.31741		4.80333	1.56678	2.13242	9.73982
	4.88667	2.34787	4.31741		4.88667	1.56678	2.13242	9.73982
	4.97	2.34787	4.70744		4.97	1.38322	2.13242	9.73982
	5.05333	2.34787	4.70744		5.05333	1.33	2.13242	9.73982
	5.13667	2.34787	4.70744		5.13667	1.33	2.13242	9.94877
	5.22	2.34787	4.70744		5.22	1.14	2.13242	10.9227
	5.30333	2.5807	4.70744		5.30333	1.14	2.13242	10.9227
	5.38667	2.5807	4.90306		5.38667	1.14	2.13242	11.3401
	5.47	2.75363	5.09902		5.47	1.14	2.13242	11.3401
	5.55333	2.75363	5.88558		5.55333	1.14	2.13242	11.3401
	5.63667	2.75363	5.88558		5.63667	1.14	2.13242	11.5495
	5.72	2.75363	5.88558		5.72	1.14	2.13242	11.7592
	5.80333	2.75363	6.08276		5.80333	1.14	2.13242	11.7592
	5.88667	2.75363	6.08276		5.88667	1.14	2.13242	12.1797
	5.97	2.44182	6.08276		5.97	1.14	2.13242	12.1797
	6.05333	2.26991	6.08276		6.05333	1.15572	2.13242	12.1797
	6.13667	2.29456	6.08276		6.13667	1.15572	2.13242	12.1797
	6.22	2.51446	6.08276		6.22	1.53183	2.13242	12.3905
	6.30333	2.5632	6.08276		6.30333	1.53183	2.13242	12.6016
	6.38667	2.70416	7.07107		6.38667	1.69941	2.13242	12.6016
	6.47	2.70416	7.29932		6.47	1.69941	2.13242	12.6016
	6.55333	4.11886	7.29932		6.55333	1.69941	2.13242	12.6016
	6.63667	5.04009	7.29932		6.63667	1.69941	2.13242	12.813
	6.72	5.55203	7.24431		6.72	1.69941	2.13242	12.813
	6.80333	5.55203	7.24431		6.80333	1.69941	2.13242	12.813
	6.88667	5.55203	7.24431		6.88667	1.69941	2.13242	12.813
	6.97	5.55203	7.24431		6.97	1.69941	2.13242	13.0247
	7.05333	5.55203	7.24431		7.05333	1.69941	2.13242	13.1504
	7.13667	5.55203	7.24431		7.13667	1.69941	2.13242	13.1504
	7.22	5.55203	6.8469		7.22	1.69941	2.13242	13.364
	7.30333	5.55203	6.8469		7.30333	1.69941	2.13242	13.7777
	7.38667	5.55203	6.8469		7.38667	1.69941	2.13242	13.853
	7.47	5.55203	6.8469		7.47	1.38322	2.13242	14.2661
	7.55333	5.55203	6.8469		7.55333	1.38322	2.25743	14.2661
	7.63667	5.55203	6.64831		7.63667	1.38322	2.40865	14.2661
	7.72	5.55203	6.44981		7.72	1.38322	2.40865	14.2661
	7.80333	5.55203	5.45894		7.80333	1.38322	2.97644	14.5483
	7.88667	5.55203	4.63897		7.88667	1.38322	2.97644	14.5483
	7.97	5.79008	4.63897		7.97	1.38322	2.97644	14.5483
	8.05333	5.79008	4.219		8.05333	1.38322	2.97644	14.5483
	8.13667	5.79008	4.219		8.13667	1.38322	2.97644	14.5483
	8.22	5.79008	4		8.22	1.38322	2.97644	14.5483
	8.30333	5.70197	3.82099		8.30333	1.38322	2.97644	14.5483
	8.38667	5.61649	4.04969		8.38667	1.38322	2.97644	15.0374
	8.47	5.53376	4.04969		8.47	1.38322	2.97644	14.8317
	8.55333	5.4539	4.04969		8.55333	1.38322	2.97644	14.8317
	8.63667	5.24786	3.86264		8.63667	1.38322	2.97644	14.8317
	8.72	5.1	3.86264		8.72	1.38322	2.97644	14.8317
	8.80333	5.03115	3.86264		8.80333	1.20167	2.97644	14.8317
	8.88667	5.03115	3.86264		8.88667	1.20167	2.97644	14.8317
	8.97	4.89745	4.02492		8.97	1.20167	3.19249	14.8317
	9.05333	4.89745	4.02492		9.05333	1.20167	2.88278	15.0374
	9.13667	4.89745	4.02492		9.13667	1.20167	2.88278	15.0374
	9.22	4.89745	4.02492		9.22	1.15572	2.88278	15.4502
	9.30333	4.89745	4.02492		9.30333	1.15572	2.88278	15.4502
	9.38667	4.89745	4.02492		9.38667	1.15572	2.88278	15.4502
	9.47	4.89745	4.02492		9.47	1.15572	2.88278	15.4502
	9.55333	4.89745	4.02492		9.55333	1.15572	3.1305	15.4502
	9.63667	5.16575	4.02492		9.63667	1.15572	3.1305	15.4502
	9.72	5.23283	4.02492		9.72	1.15572	3.38325	15.4502
	9.80333	5.23283	4.02492		9.80333	1.15572	3.38325	15.4502
	9.88667	5.23283	3.93954		9.88667	0.95	3.38325	15.4502
	9.90833	5.23283	3.93954		9.90833	1.14	3.38325	15.4502
	9.93	5.23283	3.93954		9.93	1.3435	3.38325	15.4502
	9.95167	5.78813	3.93954		9.95167	1.15572	3.38325	16.2219
	9.97333	5.78813	3.93954		9.97333	1.20167	3.38325	17.2556
	9.995	5.78813	4.23792		9.995	1.20167	3.64	17.6714
	10.0167	5.78813	4.5607		10.0167	1.20167	3.64	17.6714
	10.0383	6.20101	4.75395		10.0383	1.20167	3.64	17.8797
	10.06	6.48999	4.75395		10.06	1.20167	3.38325	17.8797
	10.0817	6.48999	5.14198		10.0817	1.20167	3.38325	18.0882
	10.1033	6.28212	5.53173		10.1033	1.15572	3.1305	17.6618
	10.125	6.28212	5.53173		10.125	1.15572	3.1305	17.5173
	10.1467	6.36573	5.53173		10.1467	1.15572	2.88278	17.3019
	10.1683	6.36573	5.53173		10.1683	1.15572	2.88278	17.2584
	10.19	6.86895	5.72713		10.19	1.14	2.40865	17.2584
	10.2733	6.86895	5.92284		10.2733	1.14	2.40865	17.2584
	10.3567	6.86895	6.11882		10.3567	1.14	1.9799	17.2584
	10.44	6.79154	6.11882		10.44	1.14	1.00955	17.7779
	10.5233	6.79154	6.11882		10.5233	1.14	0.88544	17.993
	10.6067	6.92116	6.31506		10.6067	1.15572	0.88544	18.2082
	10.69	7.25603	6.31506		10.69	1.02318	0.88544	18.8546
	10.7733	7.33161	6.31506		10.7733	1.02318	0.88544	18.8546
	10.8567	7.33161	6.31506		10.8567	1.02318	0.88544	19.8939
	10.94	7.48949	6.31506		10.94	1.02318	1.00955	20.2902
	11.0233	7.40945	6.31506		11.0233	1.72052	1.00955	20.5073
	11.1067	7.40945	6.31506		11.1067	1.90948	1.00955	20.5073
	11.19	7.53741	6.51153		11.19	2.35017	1.00955	20.7244
	11.2733	7.53741	6.7082		11.2733	3.31821	1.2522	20.9416
	11.3567	7.53741	6.7082		11.3567	3.74257	1.77088	21.9967
	11.44	7.53741	6.7082		11.44	3.74257	2.03843	21.9967
	11.5233	7.53741	6.7082		11.5233	3.91234	2.5044	22.2145
	11.6067	7.53741	6.7082		11.6067	4.11033	2.88278	22.4324
	11.69	7.53741	6.7082		11.69	4.11033	3.02866	22.6504
	11.7733	7.53741	6.7082		11.7733	4.21868	3.58575	22.6504
	11.8567	7.53741	6.7082		11.8567	4.21868	4.1625	23.3044
	11.94	7.53741	6.7082		11.94	4.48416	4.76823	23.3044
	12.0233	7.53741	6.90507		12.0233	4.48416	5.66957	23.5225
	12.1067	7.53741	6.90507		12.1067	4.48416	6.29222	23.9588
	12.19	7.53741	6.90507		12.19	4.21868	6.29222	23.9588
	12.2733	7.74355	6.90507		12.2733	3.74257	6.29222	24.177
	12.3567	7.74355	6.90507		12.3567	3.74257	6.29222	24.177
	12.44	7.74355	6.90507		12.44	3.74257	6.29222	24.3952
	12.5233	7.74355	5.72713		12.5233	3.74257	6.44608	24.3952
	12.6067	7.74355	5.72713		12.6067	3.74257	6.44608	23.9588
	12.69	7.74355	5.72713		12.69	3.74257	6.44608	24.177
	12.7733	7.74355			12.7733	4.07947	6.91549	24.3684
	12.8567	7.82304			12.8567	4.24853	7.15508	24.5869
	12.94	9.15492			12.94	4.24853	7.15508	24.5623
	13.0233	9.36389			13.0233	4.24853	7.64251	24.5623
	13.1067	9.69562			13.1067	4.43152	7.64251	24.5623
	13.19	9.69562			13.19	4.43152	7.88984	24.5623
	13.2733	9.69562			13.2733	4.53221	8.02287	24.5623
	13.3567	9.69562			13.3567	4.53221	8.02287	24.5623
	13.44	9.69562			13.44	4.53221	8.2683	24.5623
	13.5233	9.78225			13.5233	4.69265	8.2683	24.5623
	13.6067	9.78225			13.6067	4.95459	8.64833	24.9998
	13.69	9.78225			13.69	4.95459	8.78772	24.9998
	13.7733	9.78225			13.7733	4.95459	9.17187	24.9998
	13.8567	9.78225			13.8567	5.11591	9.17187	24.9998
	13.94	9.78225			13.94	5.11591	9.17187	24.9998
	14.0233	9.78225			14.0233	5.11591	9.41233	24.9998
	14.1067	9.78225			14.1067	5.63951	9.41233	24.9998
	14.19	9.78225			14.19	5.63951	9.41233	24.9572
	14.2733	9.78225			14.2733	5.96309	9.41233	24.9572
	14.3567	9.99162			14.3567	5.96309	9.41233	24.9572
	14.44	9.99162			14.44	6.12732	9.41233	24.9572
	14.5233	9.99162			14.5233	6.12732	9.41233	24.9572
	14.6067	10.2616			14.6067	5.80045	9.41233	24.9572
	14.69	10.2616			14.69	5.80045	9.41233	24.9572
	14.7733	10.2616			14.7733	5.80045	9.41233	24.9572
	14.8567	10.3544			14.8567	5.80045	9.41233	24.9572
	14.94	10.3544			14.94	5.80045	9.17187	24.738
	15.0233	10.1702			15.0233	5.80045	9.17187	19.9473
	15.1067	10.1702			15.1067	5.80045	9.17187	19.9473
	15.19	10.1702			15.19	5.37737	9.41233	20.1657
	15.2733	10.1702			15.2733	5.37737	9.41233	19.9473
	15.3567	10.1702			15.3567	5.5394	9.89949	19.5107
	15.44	10.1702			15.44	5.5394	9.89949	19.2924
	15.5233	10.1702			15.5233	5.5394	9.89949	18.2653
	15.6067	10.1702			15.6067	5.5394	9.89949	18.952
	15.69	10.1702			15.69	5.5394	10.1459	18.7349
	15.7733	10.1702			15.7733	5.5394	10.5252	18.5179
	15.8567	10.1702			15.8567	5.5394	11.2872	18.301
	15.94	10.1702			15.94	5.70317	11.5311	18.301
	16.0233	10.1702			16.0233	5.70317	11.9123	17.9486
	16.1067	10.0802			16.1067	5.70317	11.9123	17.9486
	16.19	10.0802			16.19	5.70317	12.1566	17.9486
	16.2733	10.3228			16.2733	5.5394	12.1566	17.5173
	16.3567	10.3228			16.3567	5.5394	12.4024	17.5173
	16.44	10.3228			16.44	5.5394	12.4024	17.5173
	16.5233	10.3228			16.5233	5.5394	12.8983	17.5173
	16.6067	10.3228			16.6067	5.5394	12.8983	17.0865
	16.69	10.3228			16.69	5.5394	13.3991	17.0865
	16.7733	10.3228			16.7733	5.63951	12.8983	17.0865
	16.8567	10.3228			16.8567	5.63951	12.8983	17.0865
	16.94	10.4107			16.94	5.63951	12.8983	17.3019
	17.0233	10.6204			17.0233	5.58807	12.8983	17.3019
	17.1067	10.6204			17.1067	5.58807	12.8983	17.3019
	17.19	10.6204			17.19	5.58807	12.8983	17.3019
	17.2733	10.6204			17.2733	5.58807	13.1481	17.3019
	17.3567	10.6204			17.3567	5.58807	13.1481
	17.44	10.6204			17.44	5.58807	13.1481
	17.5233	10.6204			17.5233	5.74416	13.1481
	17.6067	10.71			17.6067	5.74416	13.1481
	17.69	10.71			17.69	5.74416	12.8983
	17.7733	10.71			17.7733	5.74416	12.8983
	17.8567	10.71			17.8567	5.74416	12.8983
	17.94	10.71			17.94	5.74416	12.8983
	18.0233	10.71			18.0233	5.63951	12.6497
	18.1067	10.71			18.1067	5.48044	12.4024
	18.19	10.71			18.19	5.32339	12.4024
	18.2733	10.71			18.2733	5.16856	11.9123
	18.3567	10.71			18.3567	5.01614	11.9123
	18.44	10.9869			18.44	5.01614	11.4287
	18.5233	11.222			18.5233	5.01614	11.4287
	18.6067	11.3406			18.6067	5.01614	11.4287
	18.69	11.3406			18.69	4.75	11.4287
	18.7733	11.3406			18.7733	4.75	11.1051
	18.8567	11.3406			18.8567	4.75	11.0343
	18.94	11.4325			18.94	4.75	10.8081
	19.0233	11.4325			19.0233	4.75	10.5846
	19.1067	11.4325			19.1067	4.75	10.9056
	19.19	11.4325			19.19	5.01614	11.6965
	19.2733	11.4325			19.2733	5.01614	11.6965
	19.3567	11.4325			19.3567	5.13352	11.6965
	19.44	11.4325			19.44	5.13352	11.6965
	19.5233	11.4325			19.5233	5.13352	11.6965
	19.6067	11.4325			19.6067	5.13352	11.6965
	19.69	11.4325			19.69	5.13352	11.4902
	19.7733	11.4325			19.7733	5.11238	11.4902
	19.795	11.4325			19.795	5.64911	11.4902
	19.8167	11.4325			19.8167	6.04726
	19.8383	11.4325			19.8383	6.04726
	19.86				19.86	6.04726
	19.8817				19.8817	6.44881
	19.9033				19.9033	6.44881
	19.925				19.925	6.44881
	19.9467				19.9467	6.44881
	19.9683				19.9683	6.44881
	19.99				19.99	6.44881
	20.0117				20.0117	6.44881
	20.0333				20.0333	6.72289
	20.055				20.055	6.72289
	20.0767				20.0767	6.72289
	20.16				20.16	6.72289
	20.2433				20.2433	6.72289
	20.3267				20.3267	6.72289
	20.41				20.41	6.72289
	20.4933				20.4933	6.72289
	20.5767				20.5767	6.72289
	20.66				20.66	6.72289
	20.7433				20.7433	6.72289
	20.8267				20.8267	6.72289
	20.91				20.91	6.72289
	20.9933				20.9933	6.47117
	21.0767				21.0767	6.35009
	21.16				21.16	6.35009
	21.2433				21.2433	6.23246
	21.3267				21.3267	6.23246
	21.41				21.41	6.53777
	21.4933				21.4933	6.53777
	21.5767				21.5767	6.61735
	21.66				21.66	6.61735
	21.7433				21.7433	6.61735
	21.8267				21.8267	6.61735
	21.91				21.91	6.61735
	21.9933				21.9933	6.61735
	22.0767				22.0767	6.73898
	22.16				22.16	6.73898
	22.2433				22.2433	6.73898
	22.3267				22.3267	6.73898
	22.41				22.41	6.88471
	22.4933				22.4933	7.00685
	22.5767				22.5767	7.15218
	22.66				22.66	7.15218
	22.7433				22.7433	7.41974
	22.8267				22.8267	7.41974
	22.91				22.91	7.41974
	22.9933				22.9933	7.41974
	23.0767				23.0767	7.41974
	23.16				23.16	7.27479
	23.2433				23.2433	7.41974
	23.3267				23.3267	7.41974
	23.41				23.41	7.29956
	23.4933				23.4933	7.29956
	23.5767				23.5767	7.44887
	23.66				23.66	7.44887
	23.7433				23.7433	7.44887
	23.8267				23.8267	7.44887
	23.91				23.91	7.44887
	23.9933				23.9933	7.44887
	24.0767				24.0767	7.44887
	24.16				24.16	7.29956
	24.2433				24.2433	7.29956
	24.3267				24.3267	7.15218
	24.41				24.41	7.15218
	24.4933				24.4933	7.15218
	24.5767				24.5767	7.15218
	24.66				24.66	7.00685
	24.7433				24.7433	7.00685
	24.8267				24.8267	7.00685
	24.91				24.91	6.72289
	24.9933				24.9933	6.72289
	25.0767				25.0767	6.72289
	25.16				25.16	6.72289
	25.2433				25.2433	7.00685
	25.3267				25.3267	7.00685
	25.41				25.41	7.00685
	25.4933				25.4933	7.00685
	25.5767				25.5767	7.15218
	25.66				25.66	7.29956
	25.7433				25.7433	7.29956
	25.8267				25.8267	7.44887
	25.91				25.91	7.7155
	25.9933				25.9933	7.8339
	26.0767				26.0767	7.8339
	26.16				26.16	7.8339
	26.2433				26.2433	7.8339
	26.3267				26.3267	7.8339
	26.41				26.41	7.8339
	26.4933				26.4933	7.8339
	26.5767				26.5767	8.13236
	26.66				26.66	8.13236
	26.7433				26.7433	8.28409
	26.8267				26.8267	8.43737
	26.91				26.91	8.59212
	26.9933				26.9933	8.74826
	27.0767				27.0767	8.74826
	27.16				27.16	8.74826
	27.2433				27.2433	8.90571
	27.3267				27.3267	8.90571
	27.41				27.41	8.90571
	27.4933				27.4933	9.06441
	27.5767				27.5767	9.06441
	27.66				27.66	9.06441
	27.7433				27.7433	9.2243
	27.8267				27.8267	9.32743
	27.91				27.91	9.43327
	27.9933				27.9933	9.43327
	28.0767				28.0767	9.43327
	28.16				28.16	9.43327
	28.2433				28.2433	9.43327
	28.3267				28.3267	9.43327
	28.41				28.41	9.43327
	28.4933				28.4933	9.43327
	28.5767				28.5767	9.43327
	28.66				28.66	9.43327
	28.7433				28.7433	9.43327
	28.8267				28.8267	9.27698
	28.91				28.91	9.27698
	28.9933				28.9933	9.27698
	29.0767				29.0767	9.27698
	29.16				29.16	9.27698
	29.2433				29.2433	9.27698
	29.3267				29.3267	9.27698
	29.41				29.41	9.27698
	29.4933				29.4933	9.27698
	29.5767				29.5767	9.27698
	29.66				29.66	9.27698
	29.7433				29.7433	9.27698
	29.8267				29.8267
